# Supplementary material
Source: publisher figshare collection journal article supplement (https://sage.figshare.com/ndownloader/files/12778052)
Supplement: Supplementary file 1 [file 12778052]

Archive with 2 entries (2 files):
- Supplementary File 1.pdf
- Supplementary Tables.pdf
