# Supplementary material
Source: publisher figshare collection journal article supplement (https://sage.figshare.com/ndownloader/files/12778052)
Supplement: Supplementary file 1 [file 12778052 › Supplementary File 1.pdf]

---

**Supplementary File 1. MOOSE checklist.**

---

**Background**

- Problem definition ✓
- Hypothesis statement ✓
- Description of study outcome(s) ✓
- Type of exposure or intervention used ✓
- Study population ✓

**Search strategy**

- Qualifications of searchers ✓
- Search strategy, including time period included in synthesis and keywords ✓
- Effort to include all available studies, including contact with authors ✓
- Databases and registries searched ✓
- Search software used, name and version, including special features used ✓
- Use of hand searching ✓
- List of citations located and those excluded, including justification ✓
- Method of addressing articles published in languages other than English ✓
- Method of handling abstracts and unpublished articles ✓
- Description of any contact with authors ✓

**Methods**

- Description of relevance or appropriateness of studies assembled ✓
- Rationale for the selection and coding of data ✓
- Documentation of how data were classified and coded ✓
- Assessment of confounding x
- Assessment of study quality ✓
- Assessment of heterogeneity x
- Description of statistical methods in sufficient detail to be replicated x
- Provision of appropriate tables and graphics ✓

**Results**

- Graphic summarizing individual study estimates and overall estimate x
- Table giving descriptive information for each study included ✓
- Results of sensitivity testing x
- Indication of statistical uncertainty of findings ✓

**Discussion**

- Quantitative assessment of bias ✓
- Justification for exclusion ✓
- Assessment of quality of included studies ✓

**Conclusions**

- Consideration of alternative explanations for observed results ✓
  - Generalization of the conclusions ✓
  - Guidelines for future research ✓
  - Disclosure of funding source ✓
-
