# Supplementary material
Source: publisher figshare collection journal article supplement (https://sage.figshare.com/ndownloader/files/12778052)
Supplement: Supplementary file 1 [file 12778052 › Supplementary Tables.pdf]

**Supplementary Table 1. Quality assessment tool.**

| Variable                | Description                                 | Score |
|-------------------------|---------------------------------------------|-------|
| Sample size             | Patients <10                                | 0     |
|                         | Patients ≥10                                | 1     |
| Etiology                | Undefined                                   | 0     |
|                         | Defined                                     | 1     |
| Pre-operative exam      | Pain or ROM undefined or missing            | 0     |
|                         | Pain and ROM described subjectively         | 1     |
|                         | Pain and ROM quantified                     | 2     |
| Radiographic criteria   | Not described                               | 0     |
|                         | Described; but no pre-defined criteria used | 1     |
|                         | Described; pre-defined criteria used        | 2     |
| Post-operative outcomes | Pain or ROM undefined or missing            | 0     |
|                         | Pain and ROM described subjectively         | 1     |
|                         | Pain and ROM quantified                     | 2     |
| Follow-up time          | <1 years                                    | 0     |
|                         | ≥1 years                                    | 1     |
| PROM                    | Not included                                | 0     |
|                         | Included                                    | 1     |

PROM = Patient-reported outcome measures.

**Supplementary Table 2. Quality assessment scoring.**

| Study                              | Sample<br>size | Etiology | Pre-op<br>exam | Radiographic<br>criteria | Follow-<br>up | Post-op<br>outcome | PROM | Total |
|------------------------------------|----------------|----------|----------------|--------------------------|---------------|--------------------|------|-------|
| Burrows, 1937 [10]                 | 0              | 1        | 1              | 1                        | 1             | 0                  | 0    | 4     |
| Ranawat et al., 1975 [41]          | 0              | 1        | 1              | 1                        | 1             | 1                  | 0    | 5     |
| Nielsen, 1977 [38]                 | 1              | 1        | 0              | 0                        | 1             | 1                  | 0    | 4     |
| Vickers and Nielsen, 1992 [50]     | 1              | 1        | 0              | 1                        | 1             | 1                  | 0    | 5     |
| Watson et al., 1993 [51]           | 1              | 1        | 0              | 0                        | 1             | 1                  | 0    | 4     |
| Angelini et al., 1996 [4]          | 1              | 1        | 1              | 2                        | 1             | 1                  | 0    | 7     |
| Murphy et al., 1996 [37]           | 1              | 1        | 1              | 2                        | 1             | 1                  | 0    | 7     |
| De Billy et al., 1997 [8]          | 0              | 1        | 1              | 1                        | 0             | 1                  | 0    | 4     |
| Dos Reis et al., 1998 [43]         | 1              | 1        | 1              | 1                        | 1             | 1                  | 0    | 6     |
| Salon et al., 2000 [45]            | 0              | 1        | 1              | 1                        | 1             | 1                  | 0    | 5     |
| Schmidt-Rohlfing et al., 2001 [46] | 0              | 1        | 1              | 2                        | 0             | 1                  | 0    | 5     |
| Ahmed Mir et al., 2003 [2]         | 0              | 1        | 1              | 1                        | 0             | 1                  | 0    | 4     |
| Bruno et al., 2003 [9]             | 0              | 1        | 2              | 1                        | 1             | 2                  | 1    | 8     |

|                                         |   |   |   |   |   |   |   |   |
|-----------------------------------------|---|---|---|---|---|---|---|---|
| Houshian et al., 2004 [28]              | 0 | 1 | 2 | 1 | 1 | 2 | 0 | 7 |
| Dagregorio and Saint-Cast, 2005<br>[14] | 0 | 0 | 1 | 0 | 0 | 1 | 0 | 2 |
| Aharoni et al., 2006 [1]                | 0 | 0 | 2 | 1 | 1 | 2 | 0 | 6 |
| de Paula et al., 2006 [39]              | 0 | 0 | 1 | 1 | 1 | 1 | 0 | 4 |
| Glard et al., 2007 [22]                 | 0 | 0 | 2 | 1 | 1 | 2 | 0 | 6 |
| Potenza et al., 2007 [40]               | 0 | 1 | 1 | 1 | 1 | 1 | 0 | 5 |
| Laffosse et al., 2008 [31]              | 1 | 1 | 1 | 2 | 1 | 1 | 0 | 7 |
| Kampa et al., 2010 [29]                 | 0 | 1 | 1 | 2 | 1 | 1 | 1 | 7 |
| El-Gafary and El-adly, 2013 [18]        | 0 | 0 | 1 | 1 | 1 | 1 | 0 | 4 |
| Mallard et al., 2013 [35]               | 0 | 0 | 1 | 2 | 1 | 1 | 1 | 6 |
| Steinman et al., 2013 [48]              | 1 | 1 | 1 | 2 | 1 | 1 | 1 | 8 |
| Saffar and Badina, 2015 [44]            | 1 | 0 | 2 | 2 | 1 | 2 | 0 | 8 |

---
